# Supplementary material
Source: PubMed Central journal article supplement (PMC8966476)

# Supplementary Data

for

## ***N*-Acetyl- $\beta$ -D-hexosaminidases mediate the generation of paucimannosidic proteins via a putative non-canonical truncation pathway in human neutrophils**

Julian Ugonotti<sup>1</sup>, Rebeca Kawahara<sup>1</sup>, Ian Loke<sup>2</sup>, Yuqi Zhu<sup>3</sup>, Sayantani Chatterjee<sup>1</sup>, Harry C. Tjondro<sup>1</sup>, Zeynep Sumer-Bayraktar<sup>1</sup>, Sriram Neelamegham<sup>3</sup>, Morten Thaysen-Andersen<sup>1,4\*</sup>

<sup>1</sup>*Department of Molecular Sciences, Macquarie University, Sydney, NSW, Australia*

<sup>2</sup>*Cordlife Group Limited, Singapore, Singapore*

<sup>3</sup>*Department of Chemical and Biological Engineering, University at Buffalo, State University of New York, Buffalo, NY, United States of America*

<sup>4</sup>*Biomolecular Discovery Research Centre, Macquarie University, Sydney, Australia*

**\*Corresponding author:**

Dr Morten Thaysen-Andersen, PhD

Department of Molecular Sciences

Macquarie University, NSW-2109, Sydney, Australia

Ph: +61 2 9850 7487

Email: [morten.andersen@mq.edu.au](mailto:morten.andersen@mq.edu.au)

# Annotation and Fragmentation Key

● Mannose (162.0528 Da)

■ N-Acetylglucosamine (203.0794 Da)

▲ Fucose (146.0579 Da)

Ac Acetyl group (42.0106 Da)

⌋ Indicates mostly Y ions (includes oxygen of glycosidic linkage)

⌋ Indicates mostly Z ions (excludes oxygen of glycosidic linkage)

⌋ Reduced reducing end

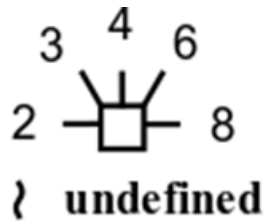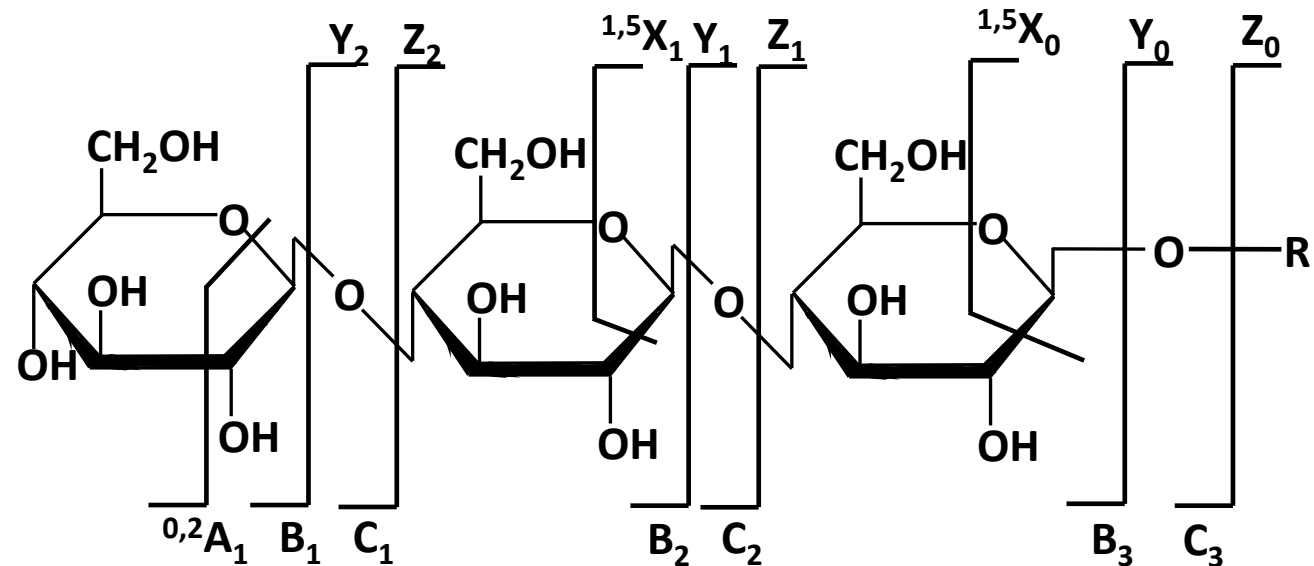

## **Supplementary Data S1**

Manually annotated PGC-LC-ESI-CID-MS/MS (-) spectra of reduced paucimannosidic *N*-glycans released from wildtype and Hex-deficient HL-60 cells

Observed  $m/z$  749.28 (1-), RT: ~13.0 min  
[M-H]<sup>-</sup> 749.28 Da

Note: Only one isomer was observed for M2, which is biosynthetically predicted to be  $\alpha$ 1,6-linkage isomer based on experience with neutrophil/HL-60 glycosylation. The  $\alpha$ 1,3-isomer, typically of lower abundance in human neutrophils, was not detected.

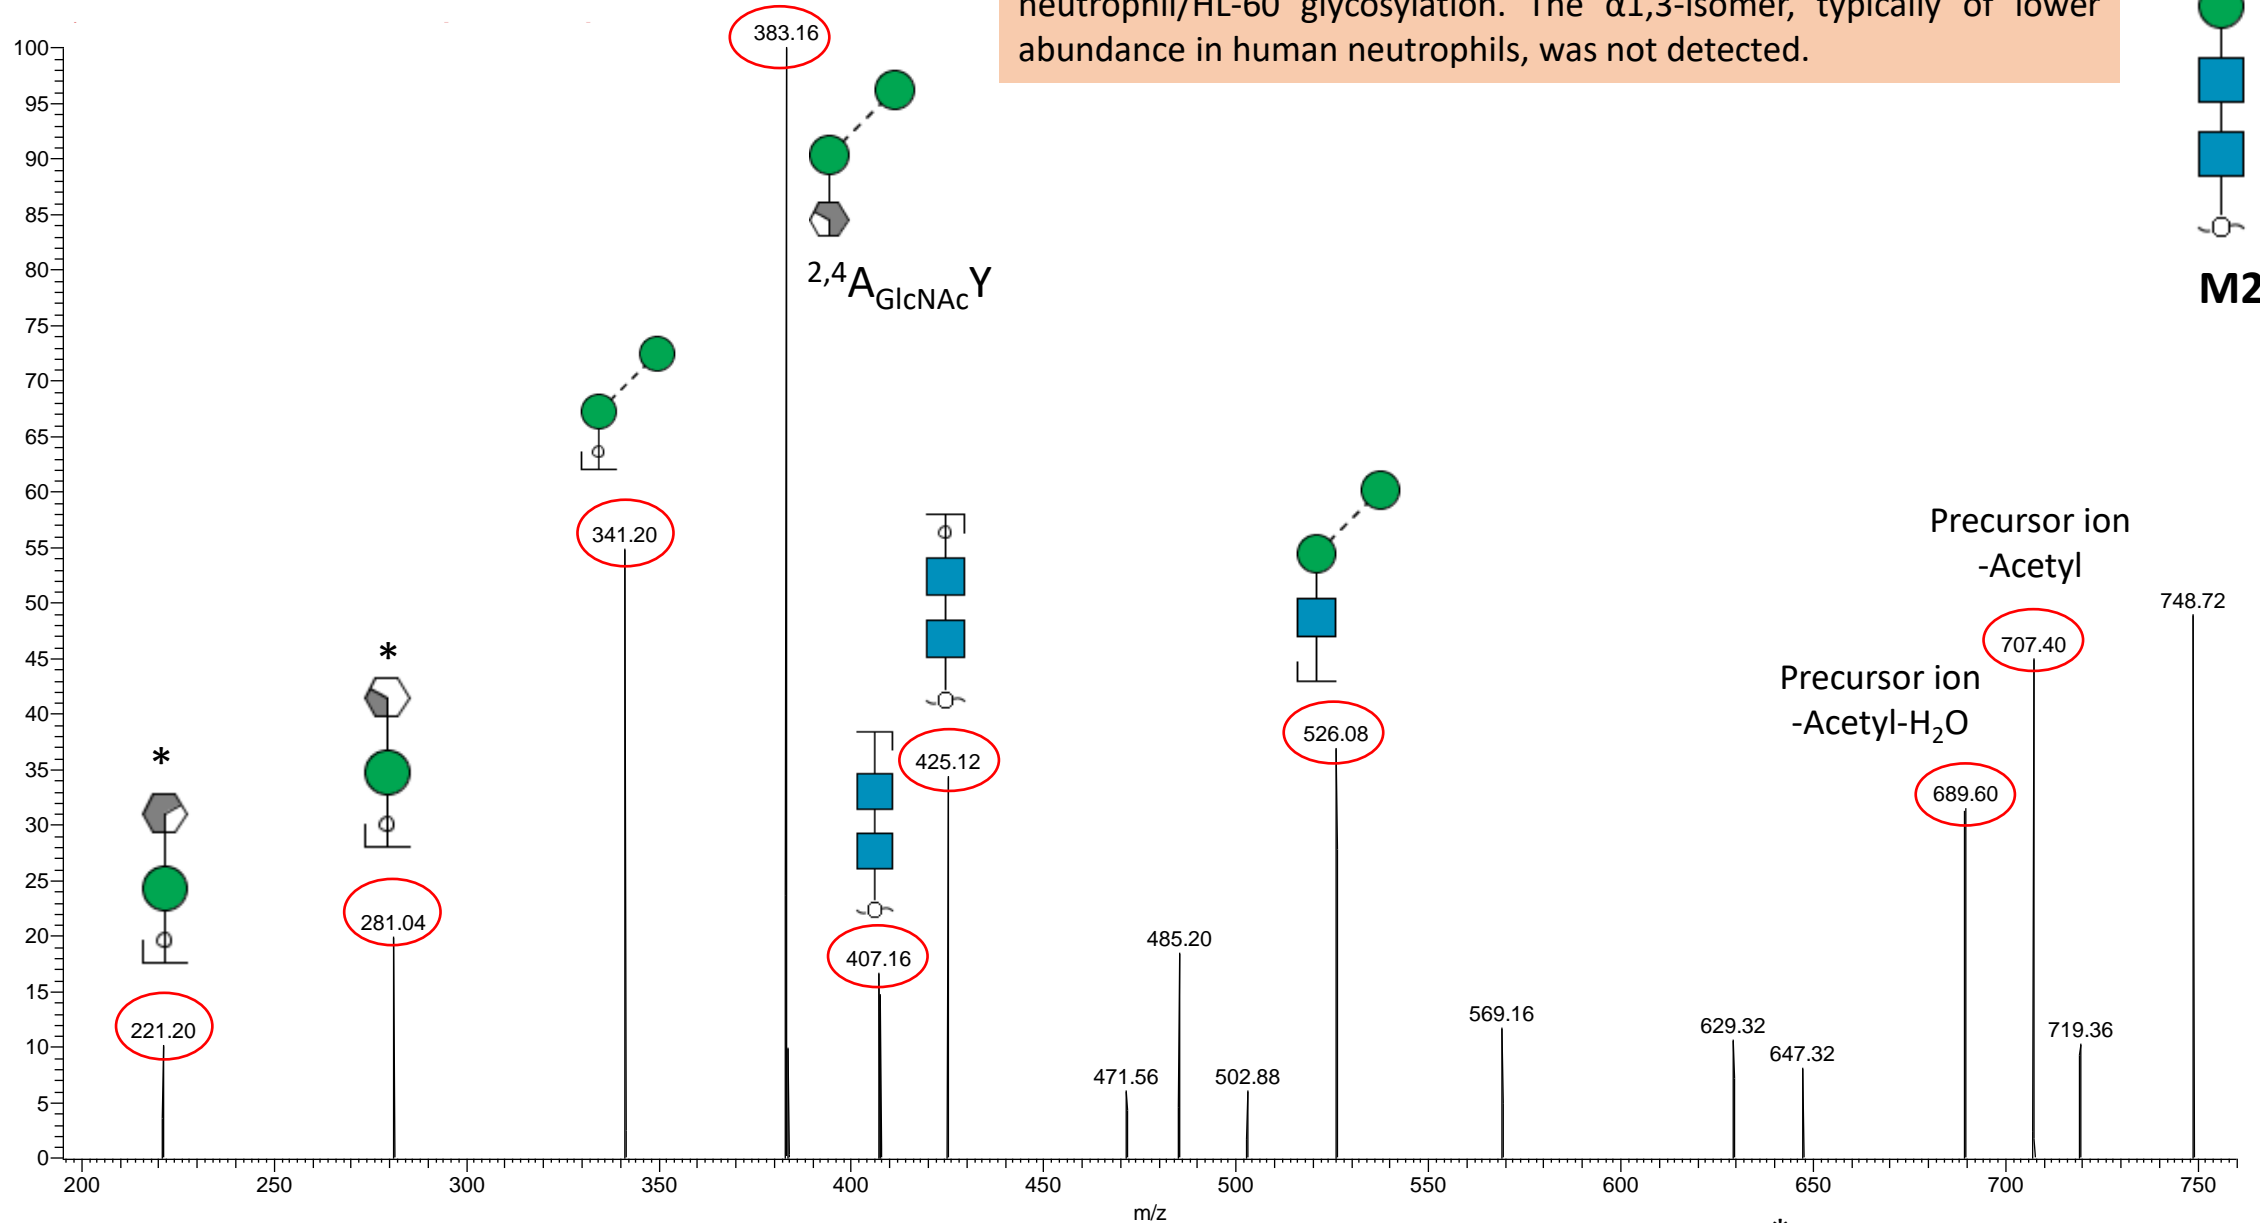

\* Ambiguity of the cross-ring fragments

Observed  $m/z$  895.36 (1-), RT: ~18.9 min  
[M-H]<sup>-</sup> 895.34 Da

Note: Identified as the  $\alpha$ 1,6-Man isomer based on PGC LC elution time, its high abundance and experience with neutrophil/HL-60 N-glycosylation.

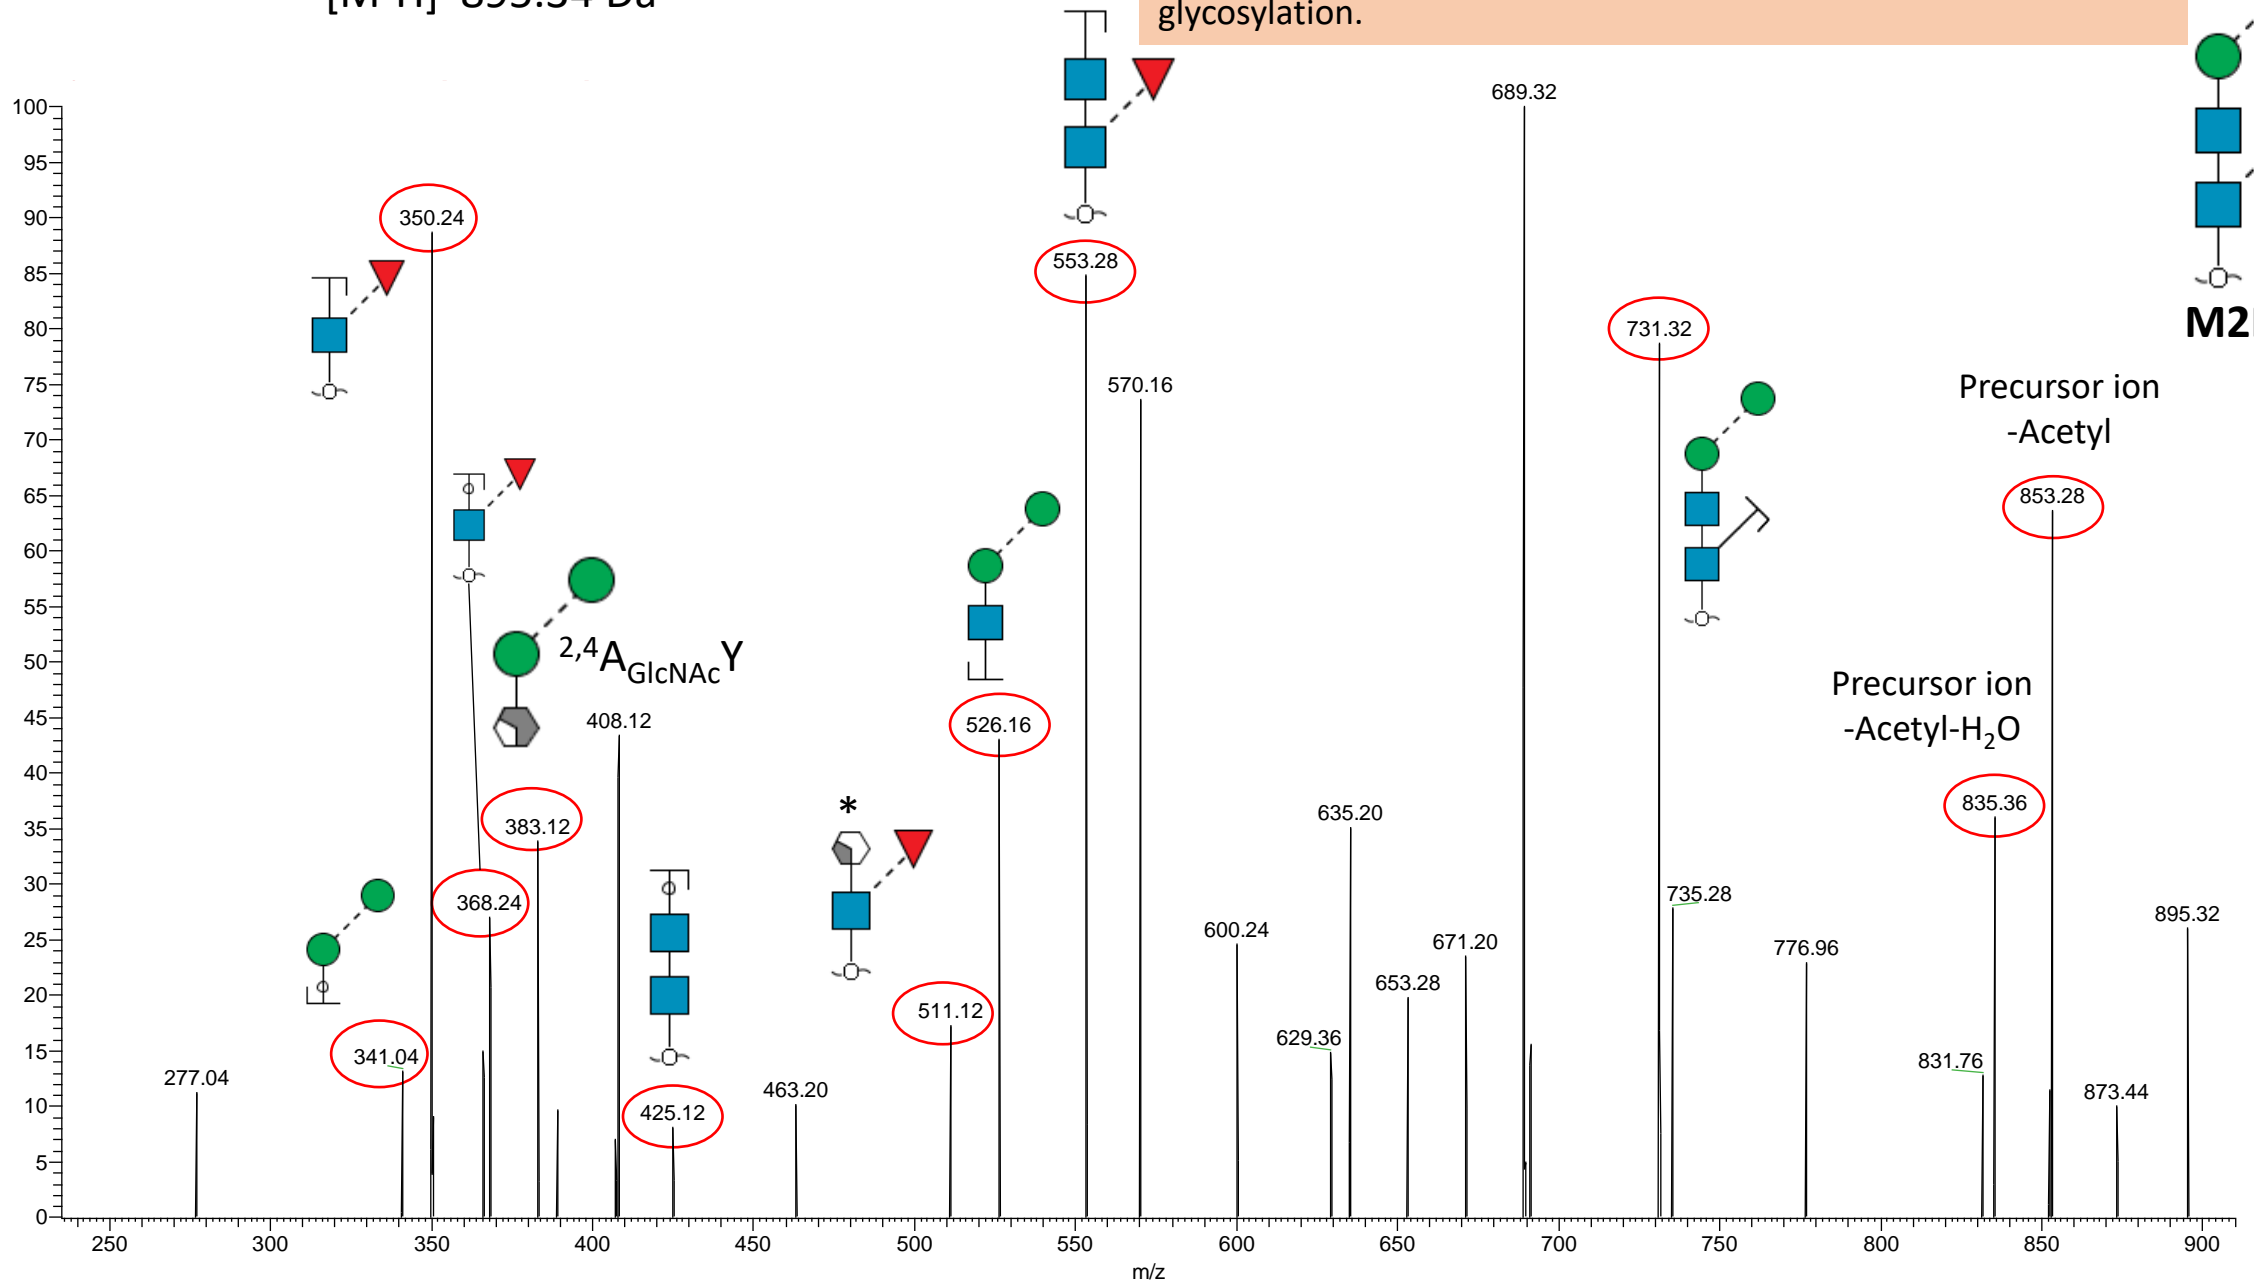

M2F

Precursor ion  
-Acetyl

Precursor ion  
-Acetyl-H<sub>2</sub>O

Observed  $m/z$  911.37 (1-), RT: ~17.8 min  
 [M-H]<sup>-</sup> 911.33 Da

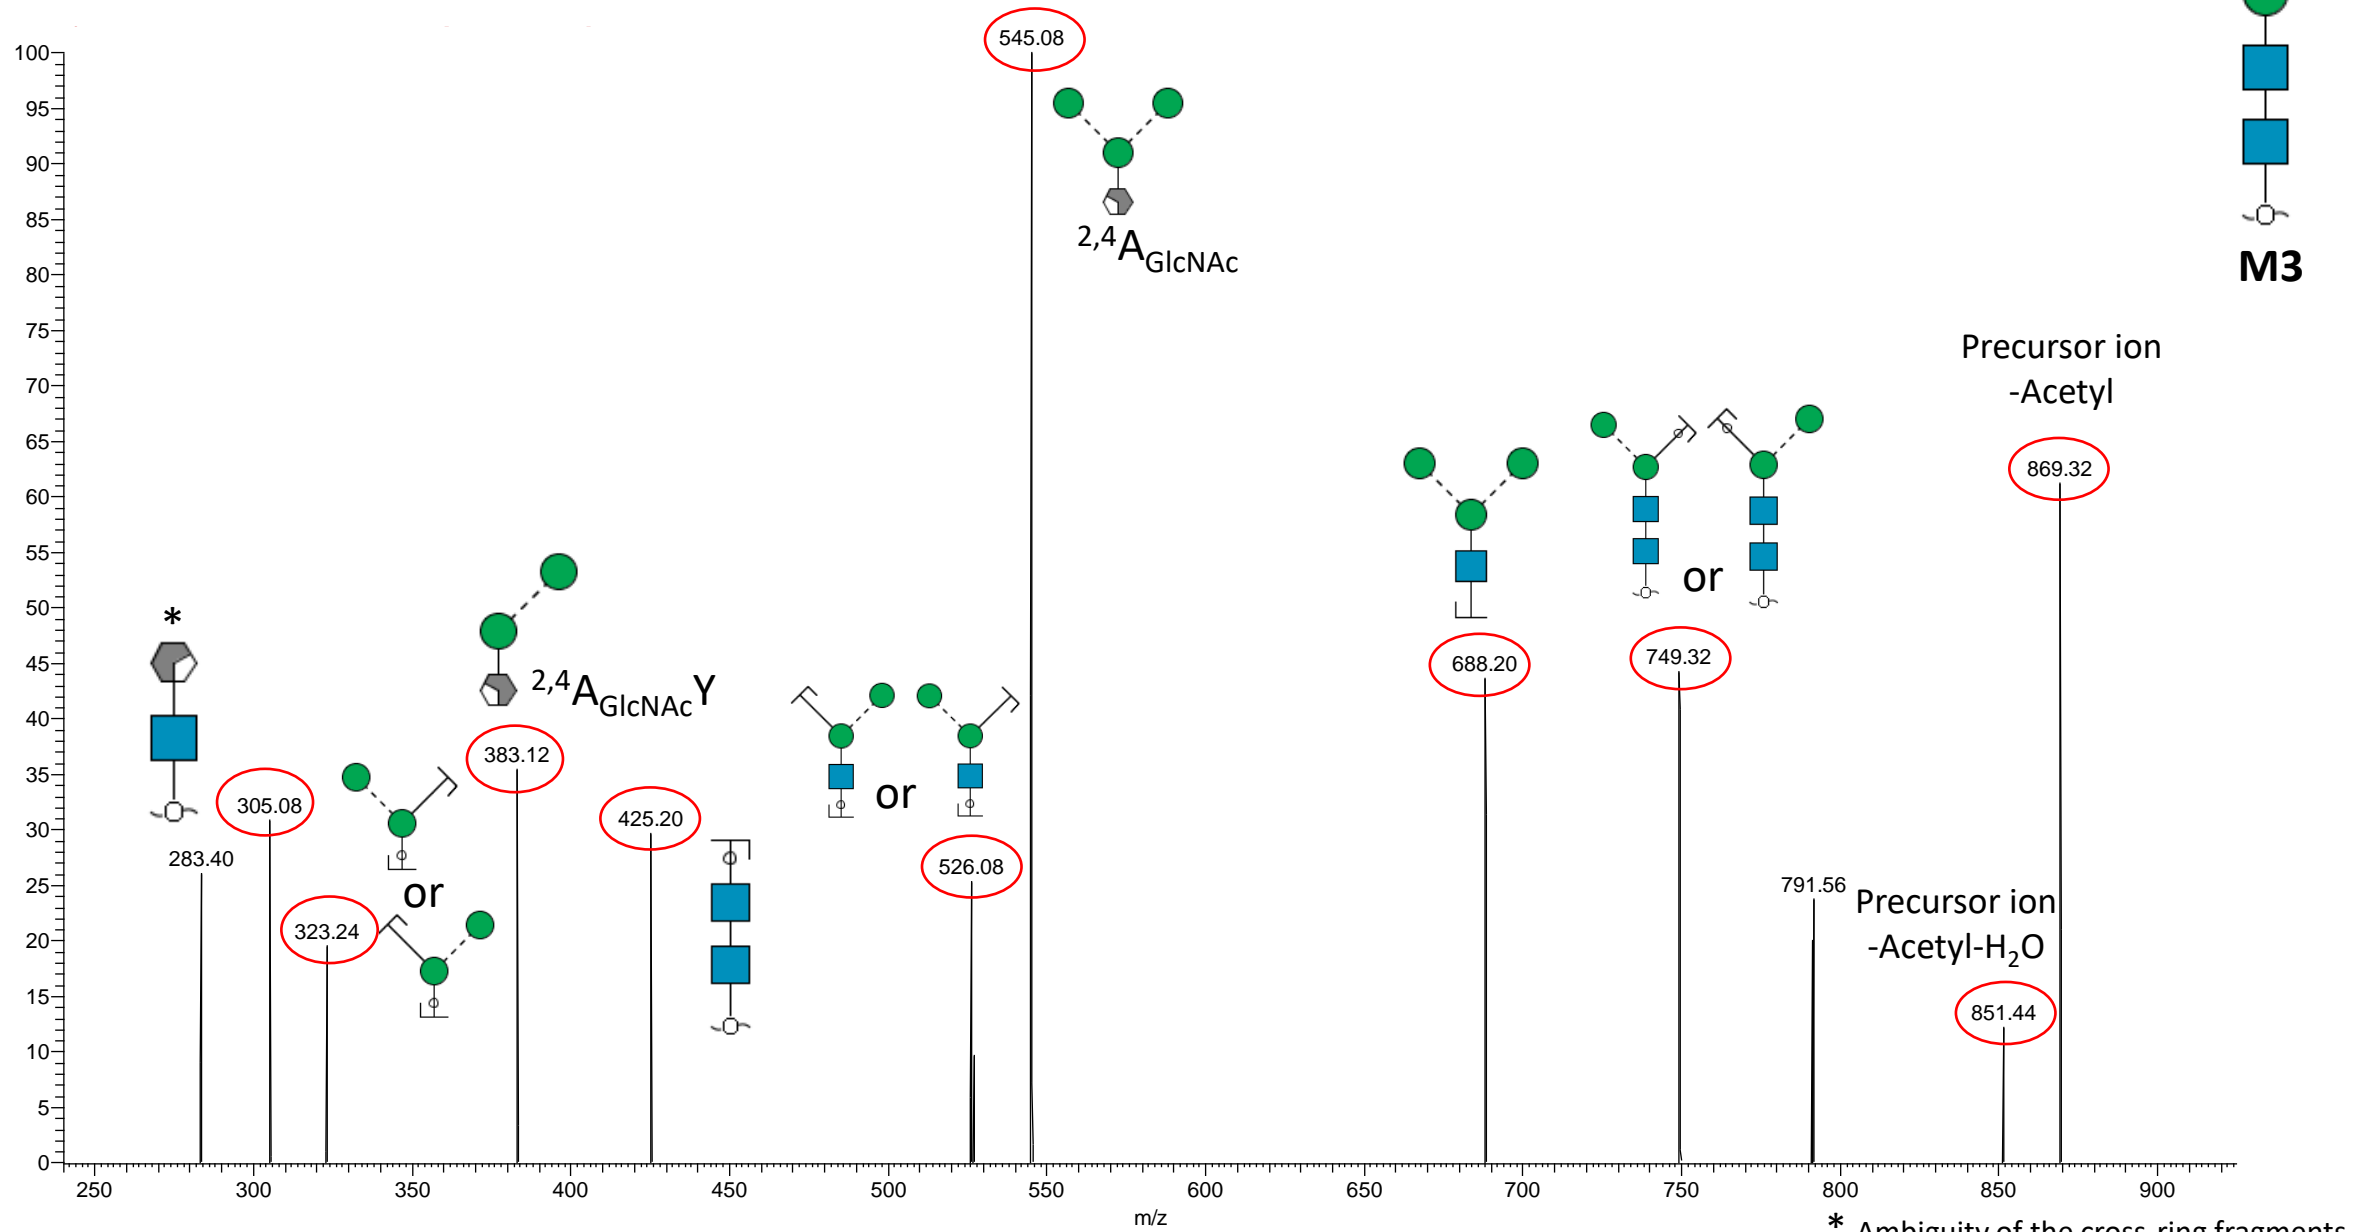

Observed  $m/z$  1057.41 (1-), RT: ~23.8 min  
[M-H]<sup>-</sup> 1057.39 Da

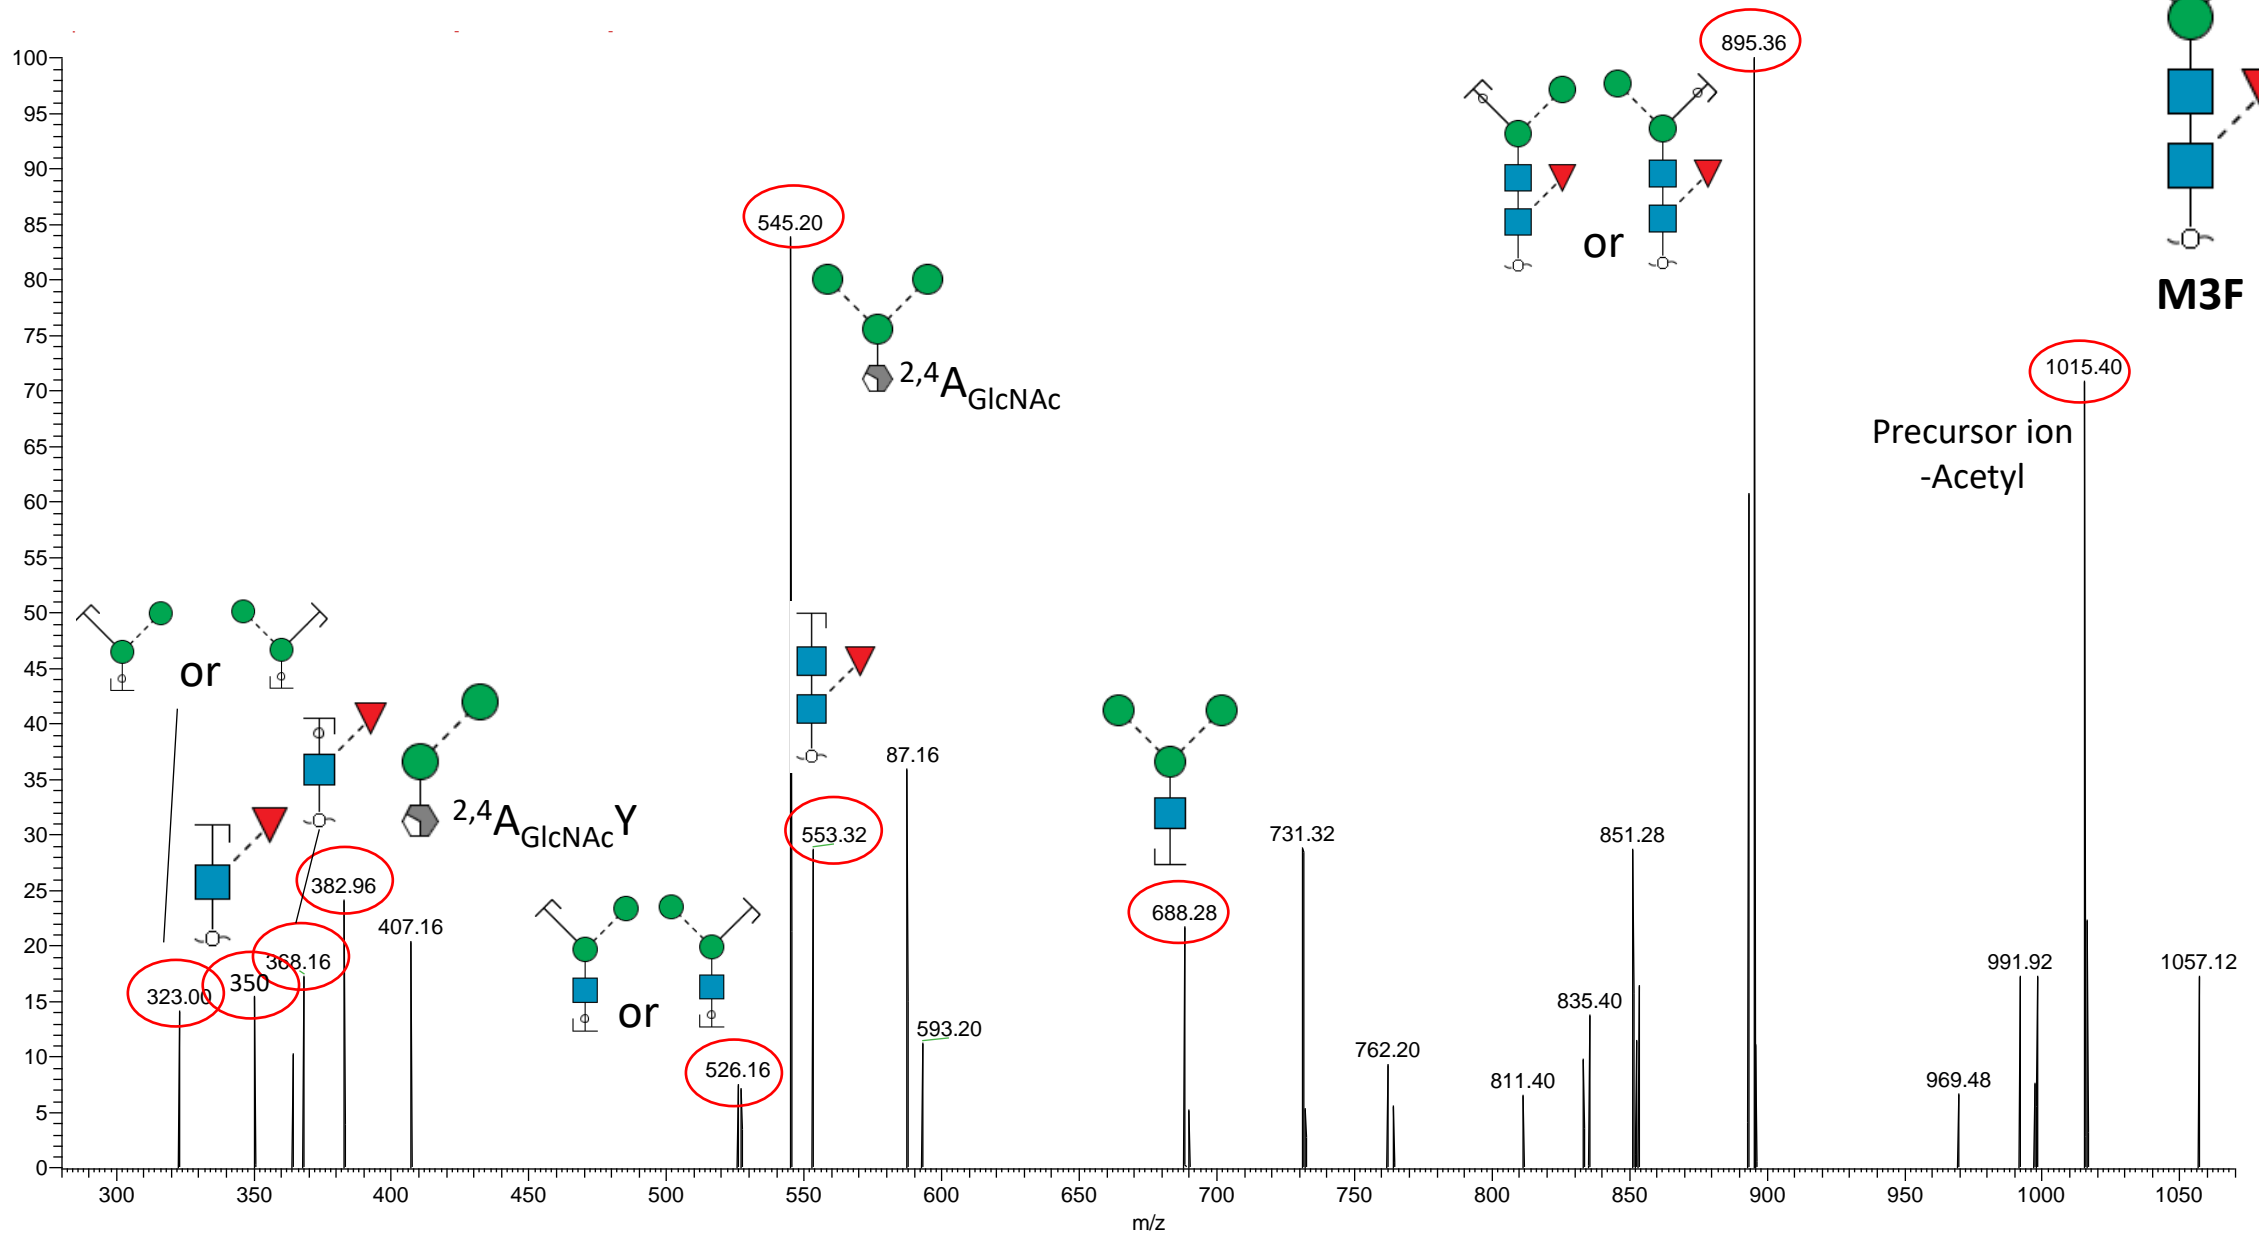

Supplement: hexpauci_supplementary_data_final_cwab108.pdf [file hexpauci_supplementary_data_final_cwab108.pdf]
